# Supplementary material for: The Autocrine Role of Placental Extracellular Vesicles from Missed Miscarriage in Causing Senescence: Possible Pathogenesis of Missed Miscarriage
Source: MDPI journal article supplement (doi:10.3390/cells11233873), 2022-12-01

### **Figure legends**

Figure S1: KEGG analysis for large EVs showing top 20 pathways

Figure S2: KEGG analysis for small EVs showing top 20 pathways

Figure S3: GO analysis of biological process for large EVs showing top 20 functions

Figure S4: GO analysis of biological process for small EVs showing top 20 functions

**Figure S1: KEGG analysis for large EVs**

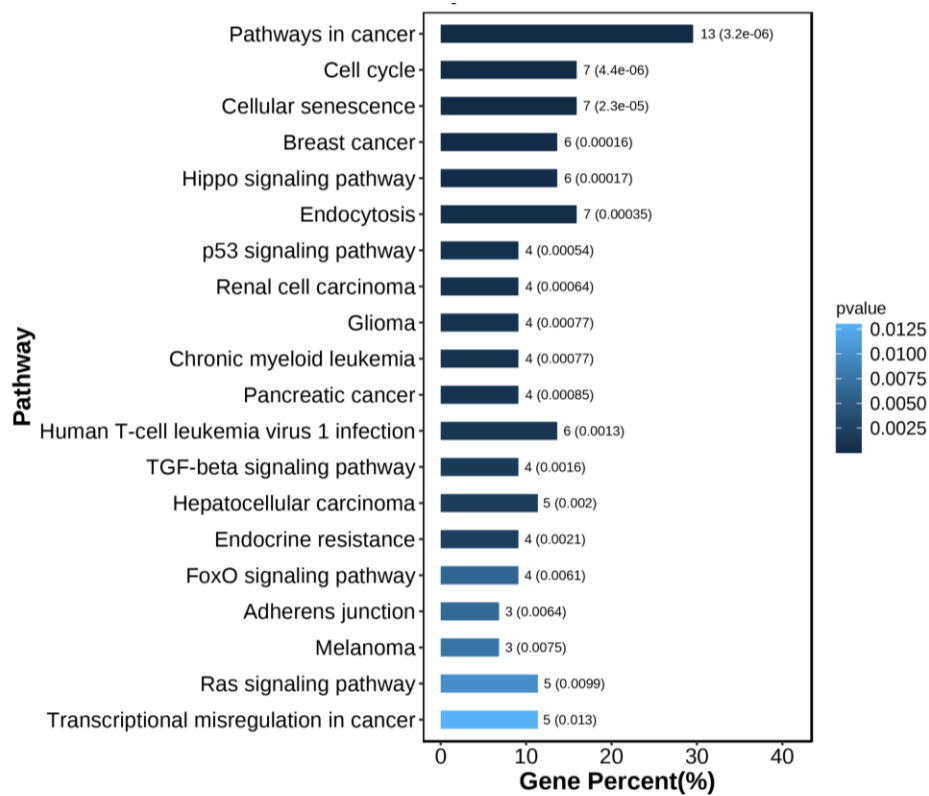

**Figure S2: KEGG analysis for small EVs**

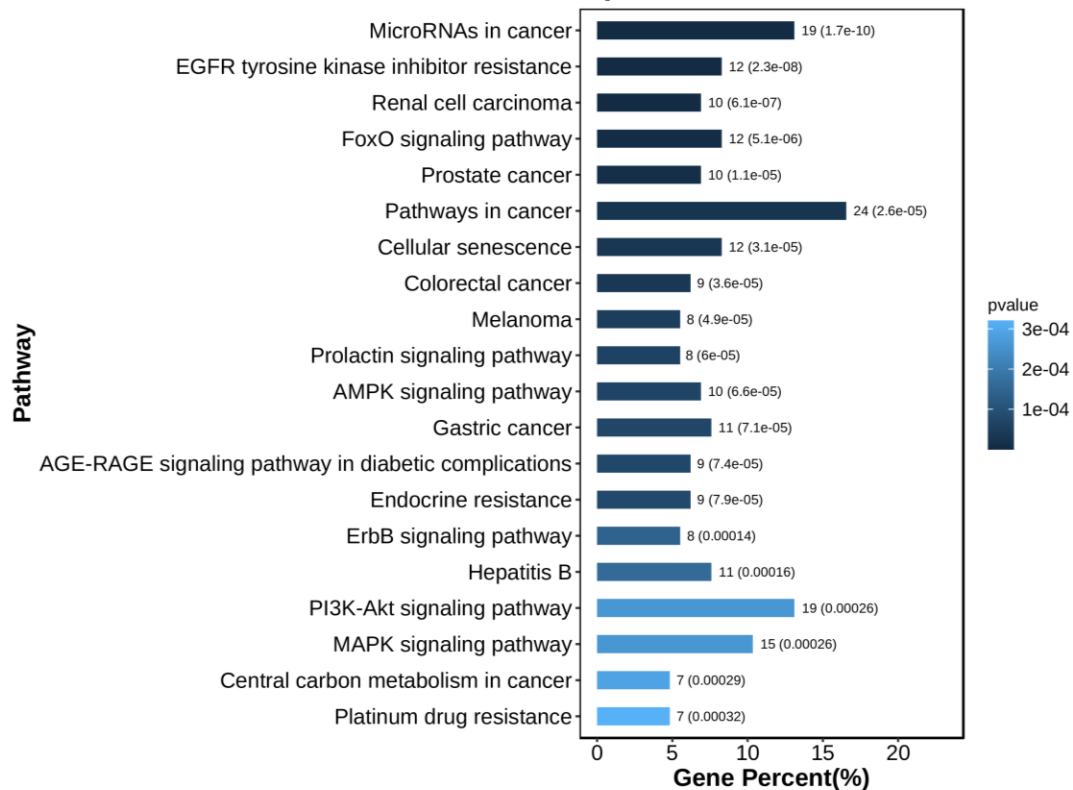

**Figure S3: GO analysis of biological process for large EVs**

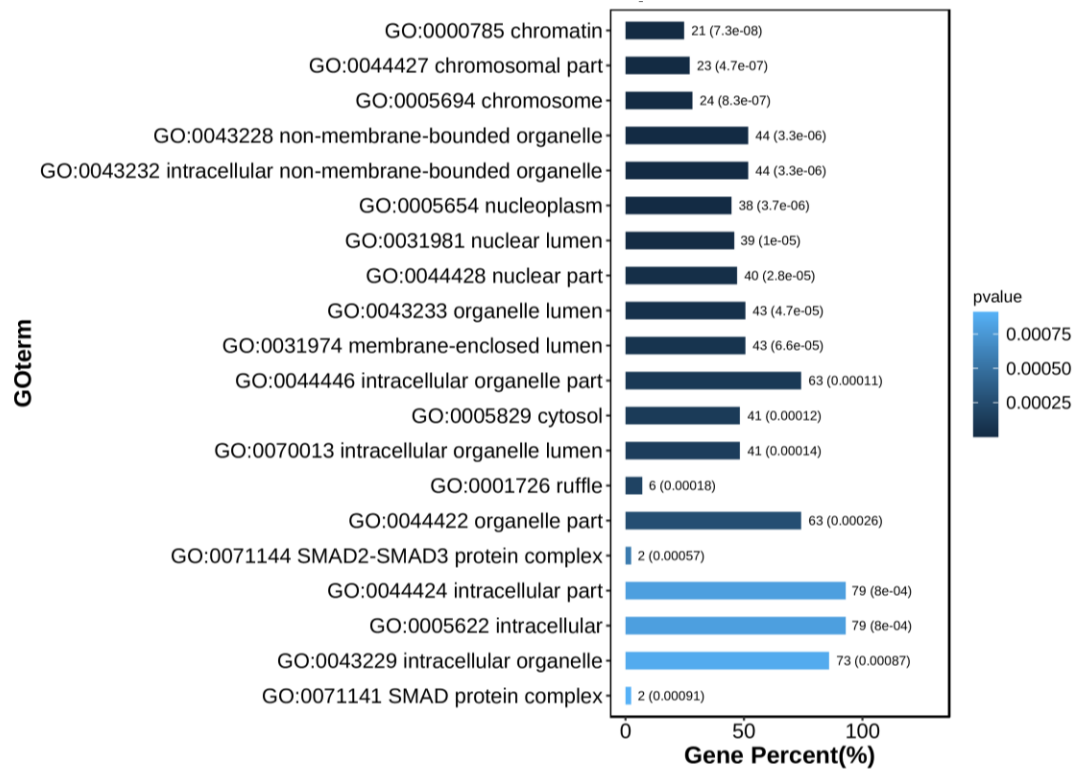

**Figure S4: GO analysis of biological process for small EVs**

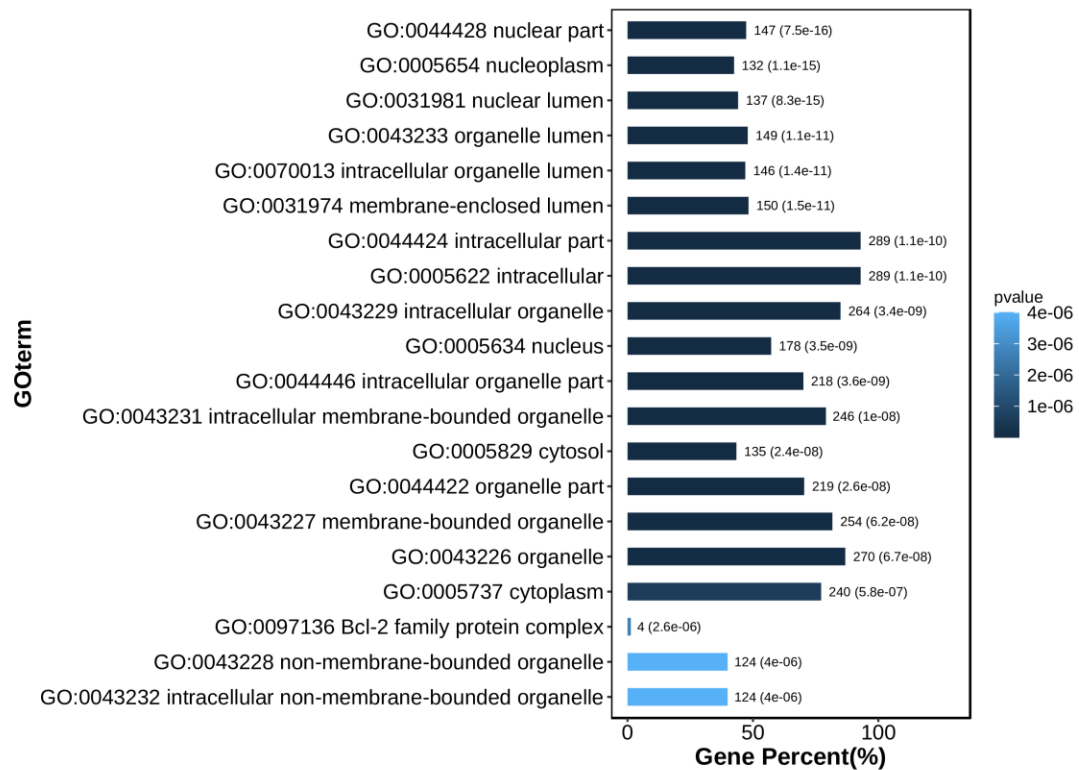

Supplement: s1 [file s1]
