# Supplementary material for: The Autocrine Role of Placental Extracellular Vesicles from Missed Miscarriage in Causing Senescence: Possible Pathogenesis of Missed Miscarriage
Source: MDPI journal article supplement (doi:10.3390/cells11233873), 2022-12-01
Supplement: s1 [file s1]

**Table S1 Abundantly expressed miRNAs in placental large EVs**

| <b>Up regulated miRNA(n=18)</b> | <b>Down regulated miRNA(n=36)</b> |
|---------------------------------|-----------------------------------|
| hsa-miR-125b-1-3p               | hsa-miR-133a-3p                   |
| hsa-miR-584-5p                  | hsa-miR-512-5p                    |
| hsa-miR-1290                    | hsa-miR-519e-5p                   |
| hsa-miR-3614-5p                 | hsa-miR-376c-3p                   |
| hsa-miR-4661-5p                 | hsa-miR-496                       |
| hsa-miR-3690                    | hsa-miR-377-5p                    |
| hsa-miR-549a-3p                 | hsa-miR-369-3p                    |
| hsa-miR-24-2-5p                 | hsa-miR-1185-5p                   |
| hsa-miR-330-5p                  | hsa-miR-376c-5p                   |
| hsa-miR-223-5p                  | hsa-miR-380-3p                    |
| hsa-miR-3918                    | hsa-miR-337-3p                    |
| hsa-miR-1246                    | hsa-miR-373-3p                    |
| hsa-miR-1301-3p                 | hsa-miR-145-5p                    |
| hsa-miR-100-5p                  | hsa-miR-376b-5p                   |
| hsa-miR-24-1-5p                 | hsa-miR-876-3p                    |
| hsa-miR-181a-2-3p               | hsa-miR-143-5p                    |
| hsa-miR-511-5p                  | hsa-miR-483-3p                    |
| hsa-miR-192-5p                  | hsa-miR-12136                     |
|                                 | hsa-miR-126-5p                    |
|                                 | hsa-miR-1197                      |
|                                 | hsa-miR-154-5p                    |
|                                 | hsa-miR-376a-3p                   |
|                                 | hsa-miR-675-3p                    |
|                                 | hsa-miR-539-3p                    |
|                                 | hsa-miR-1-3p                      |
|                                 | hsa-miR-133b                      |
|                                 | hsa-miR-655-3p                    |
|                                 | hsa-miR-873-3p                    |
|                                 | hsa-miR-487b-3p                   |
|                                 | hsa-miR-199a-5p                   |
|                                 | hsa-miR-214-3p                    |
|                                 | hsa-miR-378a-5p                   |
|                                 | hsa-miR-199b-3p                   |
|                                 | hsa-miR-199a-3p                   |
|                                 | hsa-miR-519b-3p                   |
|                                 | hsa-miR-665                       |

**Table S2 Abundantly expressed miRNAs in placental small EVs**

| <b>Up-regulated miRNAs (n=35)</b> | <b>Down-regulated miRNAs (n=59)</b> |
|-----------------------------------|-------------------------------------|
| hsa-miR-1246                      | hsa-miR-133a-3p                     |
| hsa-miR-1290                      | hsa-miR-376c-3p                     |
| hsa-miR-584-5p                    | hsa-miR-376a-3p                     |
| hsa-miR-125b-1-3p                 | hsa-miR-380-3p                      |
| hsa-miR-181a-2-3p                 | hsa-miR-496                         |
| hsa-miR-330-5p                    | hsa-miR-486-3p                      |
| hsa-miR-6510-3p                   | hsa-miR-655-3p                      |
| hsa-miR-24-3p                     | hsa-miR-372-5p                      |
| hsa-miR-3934-5p                   | hsa-miR-541-3p                      |
| hsa-miR-6715b-3p                  | hsa-miR-512-5p                      |
| hsa-miR-3065-5p                   | hsa-miR-199a-5p                     |
| hsa-miR-24-2-5p                   | hsa-miR-3613-5p                     |
| hsa-miR-1910-5p                   | hsa-miR-19b-3p                      |
| hsa-miR-3614-5p                   | hsa-miR-337-3p                      |
| hsa-miR-22-5p                     | hsa-miR-133b                        |
| hsa-miR-3925-5p                   | hsa-miR-495-3p                      |
| hsa-miR-125b-5p                   | hsa-miR-206                         |
| hsa-miR-4800-3p                   | hsa-miR-1185-5p                     |
| hsa-miR-4728-3p                   | hsa-miR-126-5p                      |
| hsa-miR-549a-3p                   | hsa-miR-372-3p                      |
| hsa-miR-9-5p                      | hsa-miR-302a-5p                     |
| hsa-miR-338-5p                    | hsa-miR-519e-5p                     |
| hsa-miR-1299                      | hsa-miR-218-5p                      |
| hsa-miR-508-3p                    | hsa-miR-381-3p                      |
| hsa-miR-937-3p                    | hsa-miR-519d-3p                     |
| hsa-miR-100-5p                    | hsa-miR-518a-3p                     |
| hsa-miR-191-3p                    | hsa-miR-1296-5p                     |
| hsa-miR-3189-3p                   | hsa-miR-126-3p                      |
| hsa-miR-6747-3p                   | hsa-miR-520g-3p                     |
| hsa-miR-1301-3p                   | hsa-miR-1197                        |
| hsa-miR-107                       | hsa-miR-451a                        |
| hsa-miR-27a-3p                    | hsa-miR-335-3p                      |
| hsa-miR-3605-3p                   | hsa-miR-487b-3p                     |
| hsa-miR-2116-3p                   | hsa-miR-490-5p                      |
| hsa-miR-450a-1-3p                 | hsa-miR-520h                        |
|                                   | hsa-miR-127-5p                      |
|                                   | hsa-miR-202-5p                      |
|                                   | hsa-miR-1323                        |
|                                   | hsa-miR-1289                        |
|                                   | hsa-miR-876-3p                      |
|                                   | hsa-miR-526a-3p                     |
|                                   | hsa-miR-193a-3p                     |
|                                   | hsa-miR-143-5p                      |

|  |                   |
|--|-------------------|
|  | hsa-miR-526b-3p   |
|  | hsa-miR-490-3p    |
|  | hsa-miR-654-3p    |
|  | hsa-miR-296-3p    |
|  | hsa-miR-154-5p    |
|  | hsa-miR-1271-5p   |
|  | hsa-miR-515-5p    |
|  | hsa-miR-30b-5p    |
|  | hsa-miR-383-5p    |
|  | hsa-miR-539-5p    |
|  | hsa-miR-665       |
|  | hsa-miR-518b      |
|  | hsa-miR-377-5p    |
|  | hsa-miR-376a-2-5p |
|  | hsa-miR-3179      |
|  | hsa-miR-148a-3p   |
